# Supplementary material
Source: PubMed Central journal article supplement (PMC7494283)
Supplement: mmc1.pdf [file mmc1.pdf]

## Supplemental Information

### Mapping Neutralizing and Immunodominant Sites on the SARS-CoV-2 Spike Receptor-Binding Domain by Structure-Guided High-Resolution Serology

Luca Piccoli, Young-Jun Park, M. Alejandra Tortorici, Nadine Czudnochowski, Alexandra C. Walls, Martina Beltramello, Chiara Silacci-Fregni, Dora Pinto, Laura E. Rosen, John E. Bowen, Oliver J. Acton, Stefano Jaconi, Barbara Guarino, Andrea Minola, Fabrizia Zatta, Nicole Sprugasci, Jessica Bassi, Alessia Peter, Anna De Marco, Jay C. Nix, Federico Mele, Sandra Jovic, Blanca Fernandez Rodriguez, Sneha V. Gupta, Feng Jin, Giovanni Piumatti, Giorgia Lo Presti, Alessandra Franzetti Pellanda, Maira Biggiogero, Maciej Tarkowski, Matteo S. Pizzuto, Elisabetta Cameroni, Colin Havenar-Daughton, Megan Smithey, David Hong, Valentino Lepori, Emiliano Albanese, Alessandro Ceschi, Enos Bernasconi, Luigia Elzi, Paolo Ferrari, Christian Garzoni, Agostino Riva, Gyorgy Snell, Federica Sallusto, Katja Fink, Herbert W. Virgin, Antonio Lanzavecchia, Davide Corti, and David Veessler

|                                                     |                                                |                                                          |                                                      |                                              |                                                |                                      |                                                           |                                      |                              |                                                  |
|-----------------------------------------------------|------------------------------------------------|----------------------------------------------------------|------------------------------------------------------|----------------------------------------------|------------------------------------------------|--------------------------------------|-----------------------------------------------------------|--------------------------------------|------------------------------|--------------------------------------------------|
|                                                     | SARS-CoV-2 S/S2H13 (closed) PDB-7JV6 EMD-22494 | SARS-CoV-2 S/S2H13 (local refinement) PDB-7JV2 EMD-22491 | SARS-CoV-2 S/S2H13 (one RBD open) PDB-7JV4 EMD-22492 | SARS-CoV-2 S/S2H14 (two RBDs open) EMD-22507 | SARS-CoV-2 S/S2H14 (three RBDs open) EMD-22508 | SARS-CoV-2 S/S2A4 PDB-7JVC EMD-22506 | SARS-CoV-2 2 S/S2A4 (local refinement) PDB-7JVA EMD-22497 | SARS-CoV-2 S/S304 PDB-7JW0 EMD-22512 | SARS-CoV-2 S/S2X35 EMD-22516 | SARS-CoV-2 S/ S2X35 (local refinement) EMD-22517 |
| <b>Data collection and processing</b>               |                                                |                                                          |                                                      |                                              |                                                |                                      |                                                           |                                      |                              |                                                  |
| Magnification                                       | 130,000                                        | 130,000                                                  | 130,000                                              | 36,000                                       | 36,000                                         | 130,000                              | 130,000                                                   | 130,000                              | 36,000                       | 36,000                                           |
| Voltage (kV)                                        | 300                                            | 300                                                      | 300                                                  | 200                                          | 200                                            | 300                                  | 300                                                       | 300                                  | 200                          | 200                                              |
| Electron exposure (e <sup>-</sup> /Å <sup>2</sup> ) | 70                                             | 70                                                       | 70                                                   | 60                                           | 60                                             | 70                                   | 70                                                        | 70                                   | 60                           | 60                                               |
| Defocus range (µm)                                  | 0.4-3.4                                        | 0.4-3.4                                                  | 0.4-3.4                                              | 1.0-2.5                                      | 1.0-2.5                                        | 0.4-2.4                              | 0.4-2.4                                                   | 1.5-2.8                              | 0.8-2.5                      | 0.8-2.5                                          |
| Pixel size (Å)                                      | 0.525                                          | 0.525                                                    | 0.525                                                | 1.16                                         | 1.16                                           | 0.525                                | 0.525                                                     | 0.525                                | 1.16                         | 1.16                                             |
| Symmetry imposed                                    | C3                                             | C1                                                       | C1                                                   | C1                                           | C1                                             | C3                                   | C1                                                        | C3                                   | C3                           | C1                                               |
| Final particle images (no.)                         | 122,343                                        | 311,071                                                  | 137,924                                              | 9,957                                        | 10,938                                         | 28,599                               | 64,141                                                    | 39,520                               | 25,634                       | 62,547                                           |
| Map resolution (Å)                                  | 3.0                                            | 3.5                                                      | 3.4                                                  | 7.8                                          | 8.5                                            | 3.3                                  | 3.6                                                       | 4.3                                  | ~5.0                         | ~5.0                                             |
| FSC threshold                                       | 0.143                                          | 0.143                                                    | 0.143                                                | 0.143                                        | 0.143                                          | 0.143                                | 0.143                                                     | 0.143                                | 0.143                        | 0.143                                            |
| Map sharpening <i>B</i> factor (Å <sup>2</sup> )    | -68                                            | -66                                                      | -52                                                  | -368                                         | -458                                           | -46                                  | -15                                                       | -120                                 | -77                          | -167                                             |
| <b>Validation</b>                                   |                                                |                                                          |                                                      |                                              |                                                |                                      |                                                           |                                      |                              |                                                  |
| MolProbity score                                    | 0.85                                           | 0.84                                                     | 0.75                                                 |                                              |                                                | 0.88                                 | 0.71                                                      | 0.72                                 |                              |                                                  |
| Clashscore                                          | 0.61                                           | 0                                                        | 0.43                                                 |                                              |                                                | 0.95                                 | 0.64                                                      | 0.32                                 |                              |                                                  |
| Poor rotamers (%)                                   | 0                                              | 1.32                                                     | 0.1                                                  |                                              |                                                | 0.13                                 | 0.3                                                       | 0                                    |                              |                                                  |
| Ramachandran plot                                   |                                                |                                                          |                                                      |                                              |                                                |                                      |                                                           |                                      |                              |                                                  |
| Favored (%)                                         | 97.19                                          | 96.35                                                    | 97.52                                                |                                              |                                                | 97.57                                | 98.79                                                     | 97.52                                |                              |                                                  |
| Allowed (%)                                         | 2.81                                           | 3.65                                                     | 2.48                                                 |                                              |                                                | 2.29                                 | 0.97                                                      | 2.33                                 |                              |                                                  |
| Disallowed (%)                                      | 0                                              | 0                                                        | 0                                                    |                                              |                                                | 0.14                                 | 0.24                                                      | 0.14                                 |                              |                                                  |
| EMRinger score                                      | 3.26                                           | 3.48                                                     | 3.1                                                  |                                              |                                                | 3.47                                 | 3.5                                                       | 1.89                                 |                              |                                                  |

**Table S1. CryoEM data collection and refinement statistics. Related to Figures 3-6.**

|                   | Total residues in motif | Natural Variants, n>1     |                     |                               |                         |
|-------------------|-------------------------|---------------------------|---------------------|-------------------------------|-------------------------|
|                   |                         | Unique positions in motif | Total variant count | Total variants prevalence [%] | Avg. count per position |
| S309              | 22                      | 12                        | 116                 | 0.16                          | 9.7                     |
| S304              | 25                      | 9                         | 96                  | 0.13                          | 10.7                    |
| S2A4              | 19                      | 11                        | 105                 | 0.14                          | 9.5                     |
| S2H14             | 23                      | 15                        | 137                 | 0.19                          | 9.1                     |
| S2H13             | 20                      | 13                        | 244                 | 0.33                          | 18.8                    |
| RBM (CoV-2)       | 23                      | 14                        | 342                 | 0.47                          | 24.4                    |
| RBM (CoV + CoV-2) | 30                      | 19                        | 894                 | 1.22                          | 47.1                    |
| RBD               | 205                     | 90                        | 1713                | 2.33                          | 19.0                    |

**Table S2. Conservation of RBD, RBM and epitope residues in ~74'000 SARS-CoV-2 sequences (GISAID, August 11th 2020). Related to Figure 3-6.** Sum total of the variant prevalence and count for the RBD, RBM and the mAb epitope residues as well as the average count per position. CoV-2 RBM residues were determined from an improved 6M0J and CoV RBM residues from 2AJF, using a 5.0A distance cutoff between RBD and ACE2 residues using MOE.

|                                                      | S2H14 Fab                        | S2A4 Fab          | S2X35 Fab                        | RBD/S304/S309/S2H14 <sup>#</sup> |
|------------------------------------------------------|----------------------------------|-------------------|----------------------------------|----------------------------------|
| <b>PDB accession code</b>                            | 7JXC                             | 7JXD              | 7JXE                             | 7JX3                             |
| <b>Data collection</b>                               |                                  |                   |                                  |                                  |
| X-ray source                                         | ALS BL5.0.2                      | ALS BL5.0.2       | ALS BL5.0.2                      | ALS BL4.2.2                      |
| Space group                                          | P2 <sub>1</sub> 2 <sub>1</sub> 2 | P2 <sub>1</sub>   | P4 <sub>3</sub> 2 <sub>1</sub> 2 | C2                               |
| Cell dimensions                                      |                                  |                   |                                  |                                  |
| <i>a</i> , <i>b</i> , <i>c</i> (Å)                   | 56.4, 70.7, 115.6                | 59.1, 63.3, 113.9 | 56.5,56.5,252.2                  | 79.5, 127.8, 192.3               |
| $\alpha$ , $\beta$ , $\gamma$ (°)                    | 90, 90, 90                       | 90, 90, 90        | 90,90,90                         | 90, 96.7, 90                     |
| Resolution (Å)                                       | 50-2.5 (2.6-2.5)                 | 46-2.5(2.54-2.5)  | 63.04-2.04<br>(2.1-2.04)         | 47.75-2.65 (2.73-2.65)           |
| <i>R</i> <sub>sym</sub> or <i>R</i> <sub>merge</sub> | 0.084 (0.34)                     | 0.13 (0.37)       | 0.15 (2.36)                      | 0.18 (2.15)                      |
| <i>CC</i> <sub>1/2</sub>                             | 0.99 (0.92)                      | 0.98 (0.93)       | 1.0 (0.86)                       | 0.996 (0.39)                     |
| <i>I</i> / $\sigma$ <i>I</i>                         | 13 (4.5)                         | 16 (2.7)          | 14.2 (2.1)                       | 8.7 (0.7)                        |
| Completeness (%)                                     | 99 (98)                          | 88 (59)           | 99.5 (95.1)                      | 99.6 (99.9)                      |
| Redundancy                                           | 5.8 (6)                          | 8.7 (6)           | 20.8 (18)                        | 7.4 (6.8)                        |
|                                                      |                                  |                   |                                  |                                  |
| <b>Refinement</b>                                    |                                  |                   |                                  |                                  |
| Resolution (Å)                                       | 2.5                              | 2.5               | 2.04                             | 2.65                             |
| No. reflections                                      | 17070                            | 24676             | 26591                            | 52027                            |
| <i>R</i> <sub>work</sub> / <i>R</i> <sub>free</sub>  | 0.19/0.23                        | 0.20/0.26         | 0.20/0.25                        | 0.258/0.288                      |
| No. atoms                                            |                                  |                   |                                  |                                  |
| Protein                                              | 3172                             | 6488              | 3313                             | 11482                            |
| Ligand                                               | 28                               |                   |                                  | 14                               |
| <i>B</i> -factors (Å <sup>2</sup> )                  |                                  |                   |                                  |                                  |
| Protein                                              | 45                               | 60                | 43                               | 32.6                             |
| Ligand                                               | 53                               |                   |                                  | 90.0                             |
| R.m.s. deviations                                    |                                  |                   |                                  |                                  |
| Bond lengths (Å)                                     | 0.01                             | 0.01              | 0.01                             | 0.004                            |
| Bond angles (°)                                      | 1.03                             | 0.98              | 0.55                             | 1.40                             |

**Table S3. Crystallographic data collection and refinement statistics. Related to Figure 4-6.**

\*Seven datasets were merged \*Values in parentheses are for highest-resolution shell.
