# Supplementary material
Source: PubMed Central journal article supplement (PMC7494283)

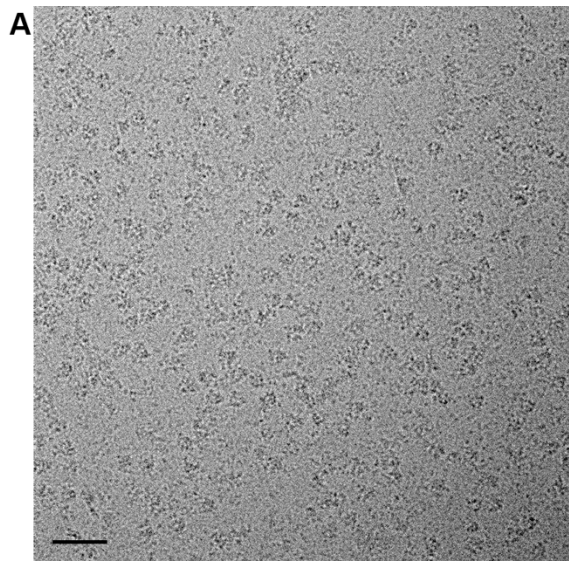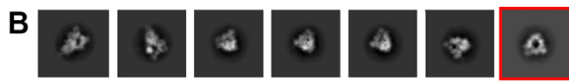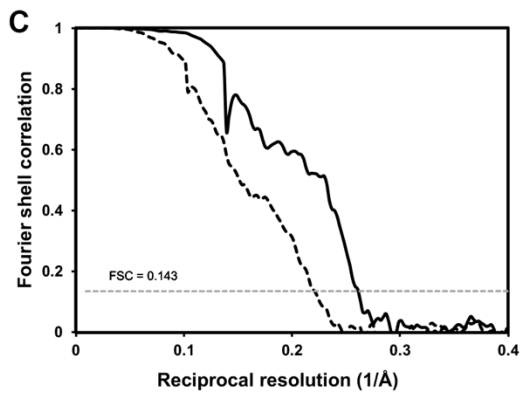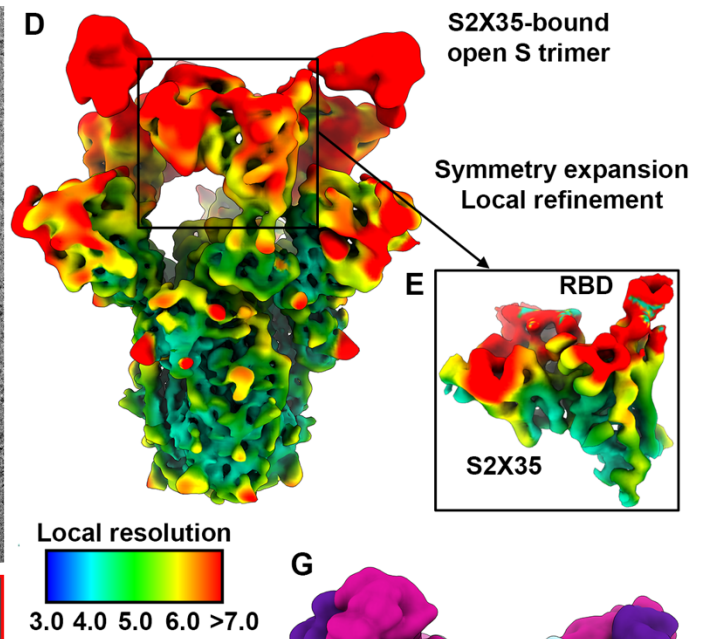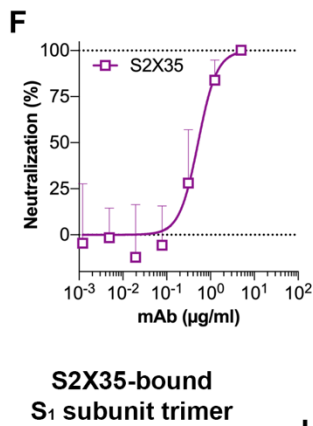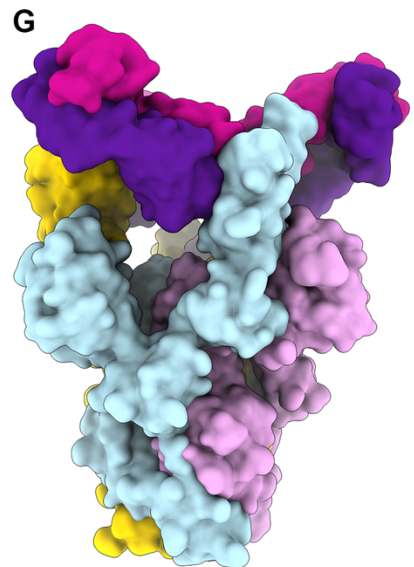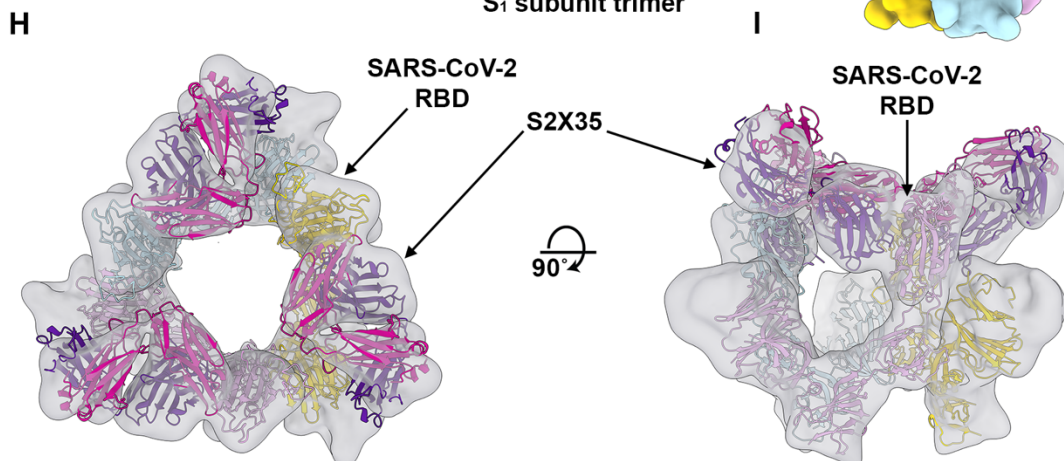

Supplement: mmc4.pdf [file mmc4.pdf]

**A**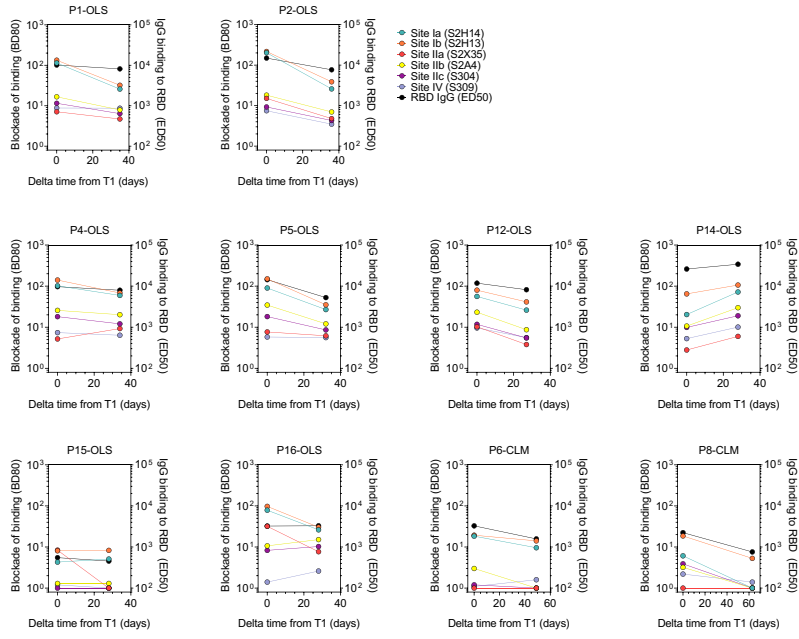**B**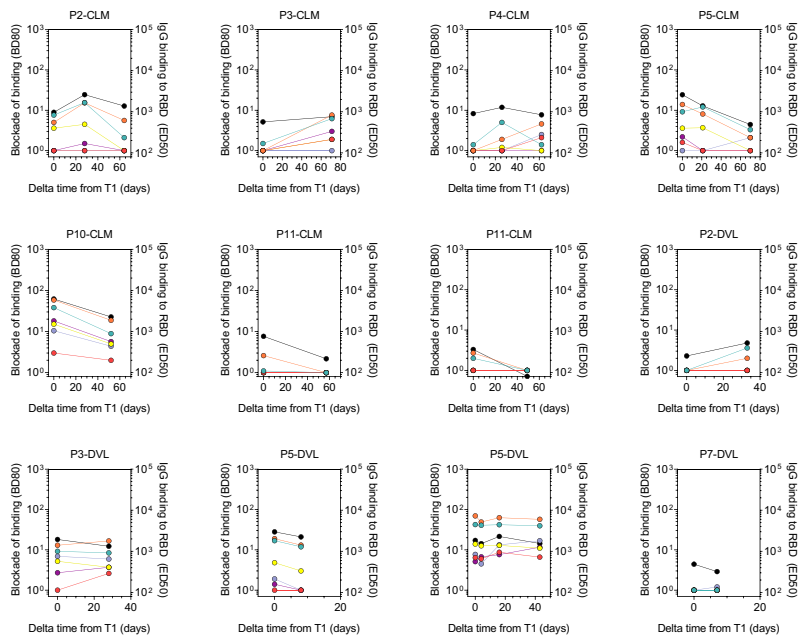

Supplement: mmc5.pdf [file mmc5.pdf]
